# Supplementary material
Source: PubMed Central journal article supplement (PMC3346350)
Supplement: supp_78.10.3552_AEM00173-12_supplemental.pdf [file supp_78.10.3552_AEM00173-12_supplemental.pdf]

## Heterologous expression of polycyclic aromatic hydrocarbon ring-hydroxylating dioxygenase genes from a novel pyrene-degrading Betaproteobacterium

David R. Singleton<sup>1</sup>, Jing Hu<sup>1</sup>, Michael D. Aitken<sup>1</sup>

<sup>1</sup>Department of Environmental Sciences and Engineering, Gillings School of Global Public Health, University of North Carolina, Chapel Hill, NC 27599-7431, USA

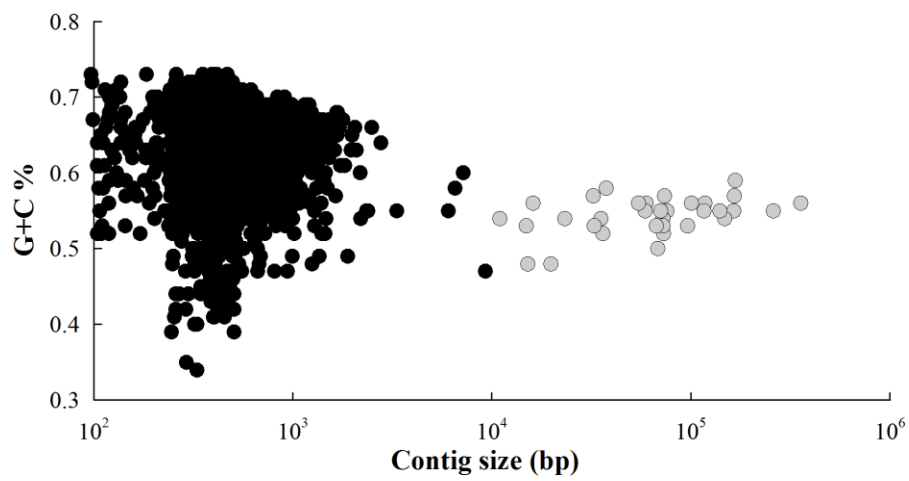

Figure S1. Contig size versus G+C% for the metagenomic library. Contigs putatively assigned to PG1 (>10kbp) are light grey circles. All other contigs are black circles.

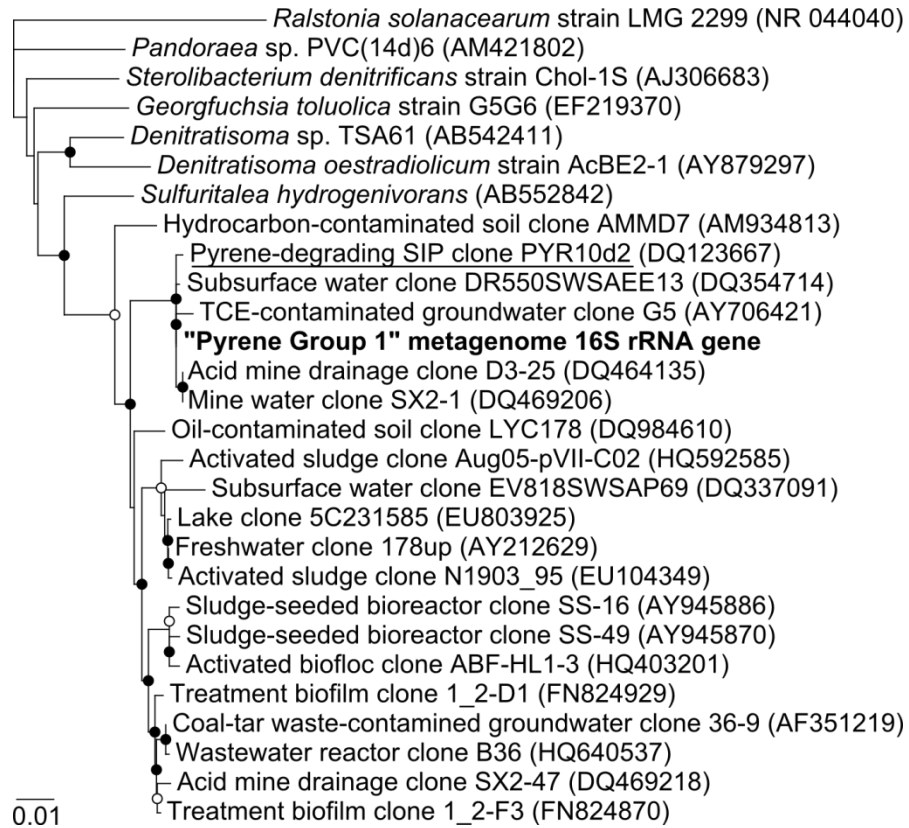

Figure S2. Neighbor-joining 16S rRNA gene tree showing Betaproteobacterial sequences with similarity to the PG1 sequence recovered from the metagenomic library (bold). The PG1 representative sequence from the prior SIP experiment with [U-<sup>13</sup>C]pyrene is underlined. Open and closed circles at nodes indicate  $\geq 95\%$  and  $\geq 50\%$  bootstrap support, respectively. GenBank accession numbers are indicated in parentheses. *Ralstonia solanacearum* was used as an outgroup.

Table S1. PCR primers used during this study

| Name    | Sequence (5' to 3') <sup>a</sup>                                       | Source                           | R.E. <sup>b</sup> | Target                           |
|---------|------------------------------------------------------------------------|----------------------------------|-------------------|----------------------------------|
| 341FGC  | [GC clamp] CCT ACG GGA GGC AGC AG                                      | Muyzer et al., 1993 <sup>c</sup> | -                 | Bacterial 16S rRNA gene for DGGE |
| 517R    | ATT ACC GCG GCT GCT GG                                                 |                                  | -                 |                                  |
| Ferre_F | GAG <u>AGG ATC</u> CTA GAG AAG GAA ATT GAT GTA TGA ATA CTC GTG TAA AAG | This study                       | BamHI             | ORF_129290                       |
| Ferre_R | TCT <u>CAG ATC</u> TTT ACG CTT CCA CTT CCG CCT C                       |                                  | BglIII            | Ferredoxin                       |
| Reduc_F | GAG <u>AAG ATC</u> TAG AAG GAT CCT GAT TTA TGG AAA CTG GTT TTT CGA TC  | This study                       | BglIII            | ORF_129230                       |
| Reduc_R | TCT <u>CCT GCA</u> GTT AAT AAA AAC GGT CGA AAT GC                      |                                  | PstI              | Reductase                        |
| RHD-1_F | GAG <u>ACT GCA</u> GAG AAG GAA GCC CTA TCA TGT TAA ATA TTG AAA GTC TG  | This study                       | PstI              | ORF_129020, ORF_128980           |
| RHD-1_R | CTC <u>TCC ATG</u> GTT ACA ACA TGA AGT TGA GAT TTT TAC C               |                                  | NcoI              | RHD $\alpha/\beta$ subunits      |
| RHD-2_F | GAG <u>ACT GCA</u> GAG AAG AAG GAG TTG ATA TGA CAA ACG TGA GTT CGT TA  | This study                       | PstI              | ORF_11620, ORF_11630             |
| RHD-2_R | CTC <u>TCC ATG</u> GTT AAA ATA AAG TGT TCA TGT TGC TAT C               |                                  | NcoI              | RHD $\alpha/\beta$ subunits      |
| RHD-3_F | GAG <u>ACT GCA</u> GAG AAG AAG AGA GTG AAA TGG TCG ATG TAA ATA GTC TG  | This study                       | PstI              | ORF_11730, ORF_11740             |
| RHD-3_R | CTC <u>TCC ATG</u> GCT ACA TCG GGA AGT TAT GGT TCT TGC C               |                                  | NcoI              | RHD $\alpha/\beta$ subunits      |
| RHD-4_F | GAG <u>ACT GCA</u> GAG AAG AAG GAG TTG GCA TGA ATA AGC TTG AAG GCT TG  | This study                       | PstI              | ORF_92190, ORF_92180             |
| RHD-4_R | CTC <u>TCC ATG</u> GTT AAA AAA ATG TGT TCA TGT TGC TGT C               |                                  | NcoI              | RHD $\alpha/\beta$ subunits      |
| RHD-5_F | GAG <u>ACT GCA</u> GAG AAG AAA GGT GAA TAA TGA CAA GCT TTA ACT ATC AG  | This study                       | PstI              | ORF_117570, ORF_117560           |
| RHD-5_R | CTC <u>TCC ATG</u> GTC AGA AAA ACA TGT TCA GAT TTT TAT C               |                                  | NcoI              | RHD $\alpha/\beta$ subunits      |
| RHD-6_F | GAG <u>ACT GCA</u> GAG AAG AAG ATA CTG CAA TGA AAA TTG AAA AAT TCA AG  | This study                       | PstI              | ORF_124010, ORF_124000           |
| RHD-6_R | CTC <u>TCC ATG</u> GCT ACA AAT ATA TGT TGA GGT TTT TGC T               |                                  | NcoI              | RHD $\alpha/\beta$ subunits      |
| RHD-7_F | GAG <u>ACT GCA</u> GAG AAG AAA TTA CAC ATA TGA CTT CGC TGA AGC CAA CC  | This study                       | PstI              | ORF_129790, ORF_129800           |
| RHD-7_R | CTC <u>TCC ATG</u> GTT AGA GAA TGC TGG CCA TAT TGG GCA T               |                                  | NcoI              | RHD $\alpha/\beta$ subunits      |
| RHD-8_F | GAG <u>ACT GCA</u> GAG AAG AAA GGC GGT GCA TGG GTG ATT TCG ACG CGT TA  | This study                       | PstI              | ORF_129740, ORF_129750           |
| RHD-8_R | CTC <u>TCC ATG</u> GTT ACA GGA TAA ACA ACA AAT TTT TTC C               |                                  | NcoI              | RHD $\alpha/\beta$ subunits      |

<sup>a</sup> Underlined regions indicate restriction sites

<sup>b</sup> Restriction enzyme targeting the indicated site

<sup>c</sup> Muyzer, G., E. C. de Waal, and A. G. Uitterlinden. 1993. Profiling of complex microbial populations by denaturing gradient gel electrophoresis analysis of polymerase chain reaction-amplified genes coding for 16S rRNA. *Appl. Environ. Microbiol.* 59:695-700.

**Table S2. Mismatches of PG1 RHD  $\alpha$ -subunit nucleotide sequences to recommended PCR primer pairs**

**For comprehensive targeting of dioxygenase clades (Iwai et al., 2011. Appl. Environ. Microbiol. 77:3551-7)**

| <b>DP1, Rieske_f</b> |                       |                   | <b>ARHD2R</b> |                                |                   |
|----------------------|-----------------------|-------------------|---------------|--------------------------------|-------------------|
|                      | <b>TGYMGNCAYMGNGG</b> | <i>mismatches</i> |               | <b>AANTKYTCNGCNGSNRMYTTCCA</b> | <i>mismatches</i> |
| PG1_pahAc1           | ---GC-----            | 2                 | PG1_pahAc1    | -----T-----                    | 1                 |
| PG1_pahAc2           | ---C-----             | 1                 | PG1_pahAc2    | -C-----A--A-----               | 3                 |
| PG1_pahAc3           | ---C-----             | 1                 | PG1_pahAc3    | -----A-----T-----              | 2                 |
| PG1_pahAc4           | ---C-----             | 1                 | PG1_pahAc4    | -C-----A-----G-----            | 3                 |
| PG1_pahAc5           | ---C-----             | 1                 | PG1_pahAc5    | GC-----A-----                  | 3                 |
| PG1_pahAc6           | ---C-----             | 1                 | PG1_pahAc6    | -----A--C-----                 | 2                 |
| PG1_pahAc7           | ---C-----             | 1                 | PG1_pahAc7    | -T-----G-----                  | 2                 |
| PG1_pahAc8           | ---TC-----            | 2                 | PG1_pahAc8    | -----C-----T-----              | 2                 |
| PpG7_nahAc           | -----                 | 0                 | PpG7_nahAc    | -----                          | 0                 |
| Mv_nidA              | -----                 | 0                 | Mv_nidA       | ---G-----T-----                | 2                 |

**For determination of a Rieske Center (Iwai et al., 2011. Appl. Environ. Microbiol. 77:3551-7)**

| <b>DP1, Rieske_f</b> |                       |                   | <b>Nah-for</b> |                           |                   |
|----------------------|-----------------------|-------------------|----------------|---------------------------|-------------------|
|                      | <b>TGYMGNCAYMGNGG</b> | <i>mismatches</i> |                | <b>TGCMVNTAYCAYGGYTGG</b> | <i>mismatches</i> |
| PG1_pahAc1           | ---GC-----            | 2                 | PG1_pahAc1     | --T-----                  | 1                 |
| PG1_pahAc2           | ---C-----             | 1                 | PG1_pahAc2     | -----                     | 0                 |
| PG1_pahAc3           | ---C-----             | 1                 | PG1_pahAc3     | --T-----                  | 1                 |
| PG1_pahAc4           | ---C-----             | 1                 | PG1_pahAc4     | --T-----                  | 1                 |
| PG1_pahAc5           | ---C-----             | 1                 | PG1_pahAc5     | ---T-----                 | 1                 |
| PG1_pahAc6           | ---C-----             | 1                 | PG1_pahAc6     | -----                     | 0                 |
| PG1_pahAc7           | ---C-----             | 1                 | PG1_pahAc7     | -----                     | 0                 |
| PG1_pahAc8           | ---TC-----            | 2                 | PG1_pahAc8     | -----                     | 0                 |
| PpG7_nahAc           | -----                 | 0                 | PpG7_nahAc     | -----                     | 0                 |
| Mv_nidA              | -----                 | 0                 | Mv_nidA        | -----                     | 0                 |

**For PAH-Gram Negative-type dioxygenases (Iwai et al., 2011. Appl. Environ. Microbiol. 77:3551-7)**

| <b>Ac596R</b> |                          |                   | <b>NAPH-2R</b> |                       |                   |
|---------------|--------------------------|-------------------|----------------|-----------------------|-------------------|
|               | <b>CRGGTGYCTTCCAGTTG</b> | <i>mismatches</i> |                | <b>ATSTCTTTTTCBAC</b> | <i>mismatches</i> |
| PG1_pahAc1    | -C-----T-----            | 2                 | PG1_pahAc1     | ----TC-----A--        | 3                 |
| PG1_pahAc2    | ---ACAA-----             | 4                 | PG1_pahAc2     | ---G-C-----AG-        | 4                 |
| PG1_pahAc3    | -C--G--T-----            | 3                 | PG1_pahAc3     | ---TC-----A--         | 3                 |
| PG1_pahAc4    | -C--CAGT-----            | 5                 | PG1_pahAc4     | ---G-----             | 1                 |
| PG1_pahAc5    | ---CAAT-----             | 4                 | PG1_pahAc5     | --A---CGC--ACA        | 7                 |
| PG1_pahAc6    | --CCGAA-----A            | 6                 | PG1_pahAc6     | --A-TC--G-T---        | 5                 |
| PG1_pahAc7    | -C-CAAG-----             | 5                 | PG1_pahAc7     | -AT-----G-----        | 3                 |
| PG1_pahAc8    | -C--C--T-----            | 3                 | PG1_pahAc8     | --A-----              | 1                 |
| PpG7_nahAc    | -----                    | 0                 | PpG7_nahAc     | -----                 | 0                 |
| Mv_nidA       | ---C-----C               | 2                 | Mv_nidA        | GCA--GCG-----         | 6                 |

**For PAH-Gram Positive-type dioxygenases (Iwai et al., 2011. Appl. Environ. Microbiol. 77:3551-7)**

| <b>nidA-forward</b>               |             | <b>pdo1-r</b>               |                   |
|-----------------------------------|-------------|-----------------------------|-------------------|
| <b>ATGACCACCGAAACAACCGGAACAGC</b> |             | <b>CTGACCCATGTATTCCAGCC</b> |                   |
| PG1_pahAc1                        |             | PG1_pahAc1                  | TCTG -----GC-AT   |
| PG1_pahAc2                        |             | PG1_pahAc2                  | GCAT --GC--TT---  |
| PG1_pahAc3                        |             | PG1_pahAc3                  | TCAG AA-C--GC-AT  |
| PG1_pahAc4                        |             | PG1_pahAc4                  | GCAT --G---TT---  |
| PG1_pahAc5                        |             | PG1_pahAc5                  | -CAT CGCA-TC---   |
| PG1_pahAc6                        | -TGAA--TT-A | PG1_pahAc6                  | TCCG- A-TCAT CAAG |
| PG1_pahAc7                        | A           | PG1_pahAc7                  | -CTG- A-G-AT TCGG |
| PG1_pahAc8                        |             | PG1_pahAc8                  | -CAG- A-T-C- T-GT |
| PpG7_nahAc                        |             | PpG7_nahAc                  | ----- --G-G--T-GT |
| Mv_nidA                           | -----       | Mv_nidA                     | -----             |

Blanks indicate no equivalent nucleotide position in those genes

**For PAH-Gram negative-type dioxygenases (Cébron et al., 2008. J. Microbiol. Methods 73:148-59)**

| <b>PAH-RHD<math>\alpha</math> GN F</b>       |                             | <b>PAH-RHD<math>\alpha</math> GN R</b>            |                                  |
|----------------------------------------------|-----------------------------|---------------------------------------------------|----------------------------------|
| <b>GAGATGCATACCACGTKGGTTGGA <i>mism.</i></b> |                             | <b>AGCTGTTGTTCCGGGAAGAYWGTGCMGTT <i>mism.</i></b> |                                  |
| PG1_pahAc1                                   | -C-----C-----C--C----- 4    | PG1_pahAc1                                        | --GA---A--A-----T--G--CG-A-- 9   |
| PG1_pahAc2                                   | -C--C-GC-----C-----T 6      | PG1_pahAc2                                        | CTGCA A-C-G-----A--C--CA----- 12 |
| PG1_pahAc3                                   | -T--C--C-----T-----C----- 5 | PG1_pahAc3                                        | --GA---A-----A--A--C-ACG-A-- 10  |
| PG1_pahAc4                                   | -C---GC-----TT-A--C---T 8   | PG1_pahAc4                                        | CTGCA G-C-G-----C-----A----- 10  |
| PG1_pahAc5                                   | -G--C-GC-----C-CC---G 8     | PG1_pahAc5                                        | TTGCA G---G-----C--GCCAATA-G 16  |
| PG1_pahAc6                                   | -T-----C--T-----CC----- 5   | PG1_pahAc6                                        | -CGA-ACA-----A--C-ACG--GA 13     |
| PG1_pahAc7                                   | CT---A-T--T--T---TT-GCTG 12 | PG1_pahAc7                                        | -AGAA AA-----C--CCC-----C 11     |
| PG1_pahAc8                                   | -C---ATG--T-----C----- 6    | PG1_pahAc8                                        | -TGAA-----G-----G--C-----A-C 9   |
| PpG7_nahAc                                   | -G-----1                    | PpG7_nahAc                                        | T-----A--G-----3                 |
| Mv_nidA                                      | -C--CT-C-----ACCCTC-TTG 13  | Mv_nidA                                           | T-TG--CC-G--C--G-G-CAC-TT-A- 15  |

Blanks indicate no equivalent nucleotide position in those genes

PpG7\_nahAc : *Pseudomonas putida* G7, nahAc gene  
Mv\_nidA : *Mycobacterium vanbaalenii* PYR-1, nidA gene

Table S3. Proteins from GenBank with highest similarity to predicted RHD protein sequences and other ORFs

| Contig | ORF    | Figure                              |                                                                                           | GenBank<br>Accession | % a.a.<br>Identity | % a.a.<br>Similarity | Gene <sup>b</sup> |
|--------|--------|-------------------------------------|-------------------------------------------------------------------------------------------|----------------------|--------------------|----------------------|-------------------|
|        |        | Label <sup>a</sup>                  | Strongest BLASTP Match                                                                    |                      |                    |                      |                   |
| 00018  | 11620  | A                                   | <i>Novosphingobium</i> sp. PP1Y; RHD $\alpha$ -subunit                                    | CCA92463             | 72                 | 84                   | <i>pahAc2</i>     |
|        | 11630  | B                                   | <i>Sphingobium yanoikuyae</i> ; RHD $\beta$ -subunit                                      | ABM79808             | 56                 | 71                   | <i>pahAd2</i>     |
|        | 11640  | C                                   | <i>Burkholderia</i> sp. Ch1-1; Rieske (2Fe-2S) iron-sulfur domain protein                 | EFG65990             | 67                 | 81                   |                   |
|        | 11650  | D                                   | <i>Pseudoxanthomonas spadix</i> BD-a59; small subunit aromatic oxygenase                  | EHB93918             | 54                 | 73                   |                   |
|        | 11660  | E                                   | <i>Pseudoxanthomonas spadix</i> BD-a59; small subunit aromatic oxygenase                  | EHB93991             | 53                 | 72                   |                   |
|        | 11670  | F                                   | <i>Sphingomonas</i> sp. CHY-1; salicylate 1-hydroxylase $\alpha$ -subunit                 | CAG17582             | 63                 | 77                   |                   |
|        | 11680  | G                                   | Rhizobiales bacterium HF4000_48A13; phenylpropionate dioxygenase $\alpha$ -subunit        | ADI19681             | 55                 | 71                   |                   |
|        | 11700  | H                                   | <i>Novosphingobium</i> sp. PP1Y; aromatic-ring-hydroxylating dioxygenase $\beta$ -subunit | CCA92441             | 57                 | 73                   |                   |
|        | 11710  | I                                   | <i>Alteromonas</i> sp. SN2; hypothetical protein ambt_17905                               | AEF05080             | 37                 | 58                   |                   |
|        | 11720  | J                                   | <i>Alteromonas</i> sp. SN2; protocatechuate 4,5-dioxygenase $\beta$ -subunit              | AEF05079             | 52                 | 73                   |                   |
|        | 11730  | K                                   | <i>Burkholderia</i> sp. DBT1; DbtAc                                                       | AAK62353             | 65                 | 82                   | <i>pahAc3</i>     |
| 11740  | L      | <i>Burkholderia</i> sp. DBT1; DbtAd | AAK62354                                                                                  | 50                   | 68                 | <i>pahAd3</i>        |                   |
| 05319  | 92200  | A                                   | <i>Thauera</i> sp. MZ1T; short-chain dehydrogenase/reductase SDR                          | ACR01697             | 49                 | 61                   |                   |
|        | 92190  | B                                   | <i>Novosphingobium</i> sp. PP1Y; RHD $\alpha$ -subunit                                    | CCA92463             | 74                 | 85                   | <i>pahAc4</i>     |
|        | 92180  | C                                   | <i>Sphingobium yanoikuyae</i> ; RHD $\beta$ -subunit                                      | ABM79808             | 58                 | 73                   | <i>pahAd4</i>     |
|        | 92170  | D                                   | <i>Burkholderia</i> sp. Ch1-1; Rieske (2Fe-2S) iron-sulfur domain protein                 | EFG65990             | 70                 | 82                   |                   |
|        | 92160  | E                                   | <i>Pseudoxanthomonas spadix</i> BD-a59; small subunit aromatic oxygenase                  | EHB93918             | 52                 | 71                   |                   |
|        | 92150  | F                                   | <i>Pseudoxanthomonas spadix</i> BD-a59; small subunit aromatic oxygenase                  | EHB93991             | 55                 | 75                   |                   |
|        | 92140  | G                                   | <i>Sphingomonas</i> sp. CHY-1; salicylate 1-hydroxylase $\alpha$ -subunit                 | CAG17582             | 64                 | 80                   |                   |
|        | 92130  | H                                   | <i>Acinetobacter baumannii</i> AB0057; RHD Rieske                                         | ACJ41568             | 41                 | 57                   |                   |
|        | 92120  | I                                   | <i>Sphingomonas wittichii</i> RW1; aromatic RHD, $\beta$ -subunit                         | ABQ68235             | 39                 | 53                   |                   |
|        | 92110  | J                                   | <i>Lutiella nitroferrum</i> 2002; carboxymuconolactone decarboxylase                      | EEG08881             | 36                 | 57                   |                   |
|        | 92100  | K                                   | <i>Halanaerobium hydrogeniformans</i> ; hypothetical protein Halsal_0924                  | ADQ14370             | 27                 | 43                   |                   |
| 05407  | 118500 | A                                   | <i>Ralstonia pickettii</i> 12D; sigma54 specific transcriptional regulator Fis family     | ACS64822             | 48                 | 65                   |                   |
|        | 117610 | B                                   | <i>Burkholderia</i> sp. Ch1-1; Rieske (2Fe-2S) iron-sulfur domain protein                 | EFG68719             | 32                 | 48                   |                   |
|        | 117600 | C                                   | <i>Frankia</i> sp. Eu11c; hypothetical protein FraEu11c_5528                              | ADP83514             | 38                 | 63                   |                   |
|        | 117590 | D                                   | <i>Caulobacter</i> sp. K31; short-chain dehydrogenase/reductase SDR                       | ABZ71049             | 52                 | 66                   |                   |
|        | 117580 | E                                   | <i>Methylobacterium nodulans</i> ORS 2060; glutathione S-transferase domain protein       | ACL56876             | 40                 | 56                   |                   |
|        | 117570 | F                                   | <i>Novosphingobium</i> sp. PP1Y; RHD $\alpha$ -subunit                                    | CCA92463             | 52                 | 69                   | <i>pahAc5</i>     |
|        | 117560 | G                                   | <i>Sphingopyxis macrogoltabida</i> ; RHD $\beta$ -subunit                                 | AAN26444             | 37                 | 59                   | <i>pahAd5</i>     |
|        | 117550 | H                                   | <i>Bordetella petrii</i> ; similar to glucose 1-dehydrogenase                             | CAP41850             | 50                 | 66                   |                   |
|        | 117540 | I                                   | <i>Rhodococcus jostii</i> RHA1; flavin-binding monooxygenase                              | ABG95240             | 66                 | 79                   |                   |
| 05425  | 124030 | A                                   | <i>Methylovorus</i> sp. MP688; DNA helicase/exodeoxyribonuclease V, subunit B             | ADQ84475             | 38                 | 54                   |                   |
|        | 124020 | B                                   | <i>Dechloromonas aromatica</i> RCB; UvrD/REP helicase                                     | AAZ45225             | 48                 | 61                   |                   |
|        | 124010 | C                                   | <i>Sphingobium</i> sp. HV3; large subunit aromatic oxygenase                              | CAM32403             | 79                 | 86                   | <i>pahAc6</i>     |
|        | 124000 | D                                   | <i>Novosphingobium</i> sp. PP1Y; 3-phenylpropionate dioxygenase $\beta$ -subunit          | CCA93888             | 71                 | 84                   | <i>pahAd6</i>     |
|        | 123990 | E                                   | <i>Novosphingobium</i> sp. PP1Y; fatty acid desaturase                                    | CCA93889             | 46                 | 61                   |                   |

| Contig | ORF    | Figure             |                                                                                       | GenBank<br>Accession | % a.a.<br>Identity | % a.a.<br>Similarity | Gene <sup>b</sup> |
|--------|--------|--------------------|---------------------------------------------------------------------------------------|----------------------|--------------------|----------------------|-------------------|
|        |        | Label <sup>a</sup> | Strongest BLASTP Match                                                                |                      |                    |                      |                   |
| 05431  | 129310 | A                  | <i>Pigmentiphaga</i> sp. NDS2; putative LysR-type transcriptional regulator           | BAC53588             | 50                 | 71                   |                   |
|        | 129290 | B                  | <i>Burkholderia</i> sp. DBT1; initial dioxygenase ferredoxin DbtAb                    | AAK96190             | 61                 | 80                   | <i>pahAb</i>      |
|        | 129280 | C                  | <i>Burkholderia</i> sp. DBT1; putative monooxygenase $\alpha$ -subunit                | AAK96191             | 85                 | 93                   |                   |
|        | 129270 | D                  | <i>Burkholderia</i> sp. DBT1; putative hydrolase                                      | AAK96192             | 70                 | 82                   |                   |
|        | 129230 | E                  | <i>Cycloclasticus</i> sp. P1; PAH dioxygenase component ferredoxin reductase          | ABF56512             | 52                 | 69                   | <i>pahAa</i>      |
|        | 129130 | F                  | <i>Burkholderia</i> sp. Ch1-1; dihydrodipicolinate synthetase                         | EFG65992             | 80                 | 91                   |                   |
|        | 129090 | G                  | <i>Acidovorax</i> sp. NA3; putative 2-hydroxychromene-2-carboxylate isomerase         | ACG70975             | 52                 | 68                   |                   |
|        | 129020 | H                  | <i>Burkholderia</i> sp. DBT1; DbtAc                                                   | AAK62353             | 67                 | 82                   | <i>pahAc1</i>     |
|        | 128980 | I                  | <i>Burkholderia</i> sp. DBT1; DbtAd                                                   | AAK62354             | 50                 | 70                   | <i>pahAd1</i>     |
|        | 129200 | J                  | <i>Methyloversatilis universalis</i> FAM5; putative cox2 cytochrome oxidase subunit 2 | EGK69739             | 49                 | 62                   |                   |
|        | 129300 | K                  | <i>Methyloversatilis universalis</i> FAM5; hypothetical protein METUNv1_03703         | EGK69740             | 50                 | 65                   |                   |
| 05432  | 129870 | A                  | <i>Methylibium petroleiphilum</i> PM1; conserved hypothetical protein                 | ABM95224             | 44                 | 64                   |                   |
|        | 129840 | B                  | <i>Sphingopyxis macrogoltabida</i> ; cis-dihydrodiol dehydrogenase                    | AAN26445             | 66                 | 80                   |                   |
|        | 129770 | C                  | <i>Azoarcus</i> sp. BH72; conserved hypothetical flavin reductase                     | CAL94579             | 59                 | 74                   |                   |
|        | 129780 | D                  | <i>Burkholderia sartisoli</i> ; catechol 2,3-dioxygenase                              | AAF02426             | 75                 | 85                   |                   |
|        | 129790 | E                  | <i>Sphingomonas</i> sp. P2; RHD $\alpha$ -subunit                                     | BAC65448             | 42                 | 57                   | <i>pahAc7</i>     |
|        | 129800 | F                  | <i>Azotobacter vinelandii</i> DJ; Aromatic-RHD, $\beta$ -subunit                      | ACO80345             | 35                 | 51                   | <i>pahAd7</i>     |
|        | 129810 | G                  | <i>Mycobacterium vanbaalenii</i> PYR-1; succinate dehydrogenase/fumarate reductase    | AAT51748             | 67                 | 81                   |                   |
|        | 129820 | H                  | <i>Mycobacterium</i> sp. KMS; 4Fe-4S ferredoxin, iron-sulfur binding domain protein   | ABL90868             | 63                 | 72                   |                   |
|        | 129830 | I                  | <i>Mycobacterium rhodesiae</i> NBB3; hypothetical protein MycrhNDRAFT_2578            | EHB48945             | 51                 | 68                   |                   |
|        | 129850 | J                  | <i>Mycobacterium rhodesiae</i> NBB3; Rieske (2Fe-2S) iron-sulfur domain protein       | EHB48946             | 66                 | 80                   |                   |
|        | 129860 | K                  | <i>Sphingomonas wittichii</i> RW1; aromatic RHD, $\beta$ -subunit                     | ABQ67262             | 47                 | 62                   |                   |
|        | 129720 | L                  | <i>Mycobacterium rhodesiae</i> NBB3; L-threonine 3-dehydrogenase                      | EHB48944             | 54                 | 68                   |                   |
|        | 129730 | M                  | <i>Burkholderia sartisoli</i> ; unknown                                               | AAF02431             | 64                 | 74                   |                   |
|        | 129740 | N                  | <i>Delftia</i> sp. Cs1-4; naphthalene 1,2-dioxygenase                                 | AEF88772             | 52                 | 71                   | <i>pahAc8</i>     |
|        | 129750 | O                  | <i>Burkholderia sartisoli</i> ; dioxygenase $\beta$ -subunit PhnAd                    | AAD09873             | 44                 | 62                   | <i>pahAd8</i>     |
|        | 129760 | P                  | <i>Pseudoxanthomonas spadix</i> BD-a59; xylene monooxygenase                          | EHB93984             | 36                 | 52                   |                   |

<sup>a</sup> As designated in Figure 3.

<sup>b</sup> Name of gene from this study.
